# Supplementary material for: Carbon dioxide balance of subarctic tundra from plot to regional scales
Source: Copernicus journal article supplement (doi:10.5194/bg-10-437-2013), 2013-01-24
Supplement: Supplementary file 1 [file bg-10-437-2013-supplement.pdf]

## **Supplementary material to article ‘Carbon dioxide balance of subarctic tundra from plot to regional scales’**

by Marushchak, M. E., Kiepe, I., Biasi, C., Elsakov, V., Friborg, T., Johansson, T., Soegaard, H., Virtanen, T., and Martikainen, P.J.

### **Supplementary methods**

#### **Auxiliary data**

Local weather was monitored at the study site with two weather stations. As a default, data was taken from weather station I. When this data was missing, complementary data was obtained from weather station II. Weather data was collected to a data logger (CR23X, Campbell Scientific, UK/Hobo Micro Station H21-002, Onset, USA for weather station I/weather station II, respectively) on following parameters: air temperature (Hygromer MP100A, Rotronic, USA/S-THA-M006, Onset, USA), soil heat flux (HFP01, Hukseflux Thermal Sensors, the Netherlands/-), net radiation (NR LITE, Kipp & Zonen, the Netherlands/-), photosynthetically active radiation (PAR) (LI-190, LI-COR, USA/S-LIA-M003, Onset, USA), precipitation (7852 Rain Collector II, Davis, USA/7852 Rain Collector, Davis, USA) and wind speed (A100R, Vector Instruments, UK/ S-WSA-M003, Onset, USA). Data from the weather station II was normalized against the default data to account for the slightly different location (distance about 250 m) and different instrumentation. In addition, soil moisture, water table level (WT), active layer depth (AL; depth of the seasonal thaw) and soil temperature at a depth of 2 cm were monitored on different land cover classes by manual and continuous measurements as described by Marushchak *et al.* (2011).

The leaf area index of vascular plants (LAI; one-sided leaf area per unit ground surface area) was measured weekly from early June to early September 2008 at the chamber measurements plots and on thirteen 200-m transects starting at the EC mast (Fig. 1B) using a LAI 2000 Plant Canopy Analyzer (LiCor, NE USA). Additional LAI measurements were made fortnightly on a 1-km<sup>2</sup> grid around the EC mast. The total number of measurement points was 284. Missing weekly values were imputed by linear interpolation. Another interpolation method, a four parameter Gaussian fitting, was used to obtain daily LAI values for the chamber plots for modeling the C fluxes.

## Supplementary figures and tables

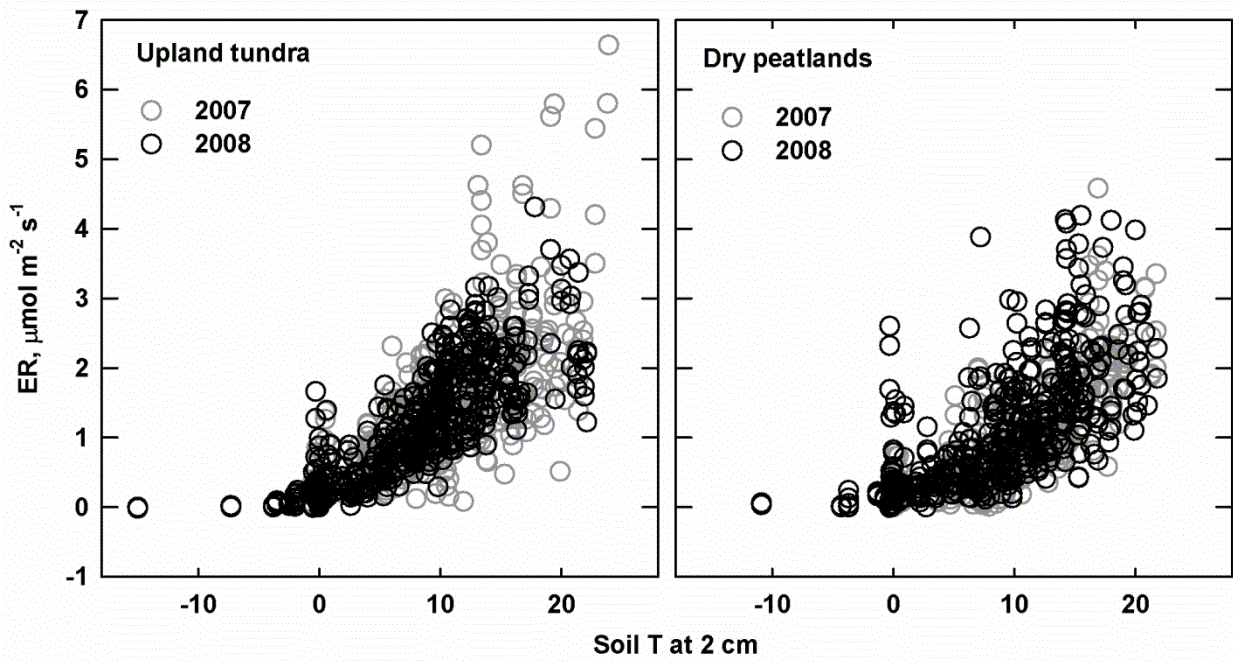

**Figure S1.** Temperature response of ecosystem respiration at the dry microsites in upland tundra and dry peatlands measured by chambers.

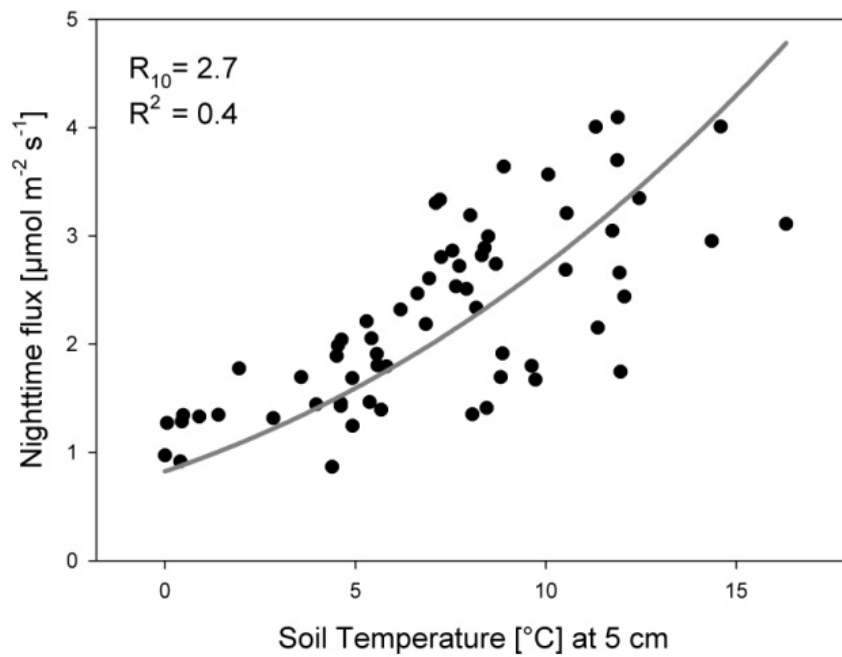

**Figure S2.** Temperature response of night-time ecosystem respiration measured by eddy covariance.

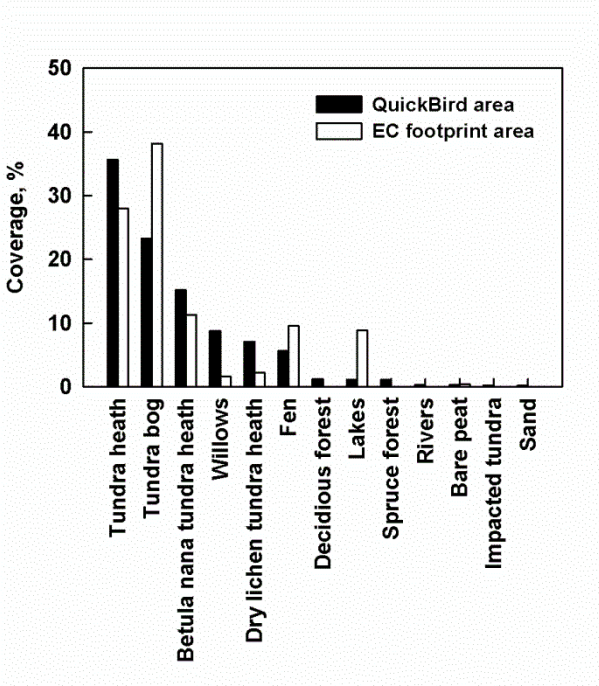

**Figure S3.** Coverage of different LCTs in the QuickBird image (98.6 km<sup>2</sup>) and in the EC footprint area.

**Table S1.** Summary of ecosystem respiration (ER) models for microsites studied with chamber technique;  $R_{10}$  = ER at 10°C,  $E_0$  = activation energy of ER.

| Period | Land cover type | Microsite                       | $R_{10}$    | $E_0$          | df      | $r^2$         | RMSE        |
|--------|-----------------|---------------------------------|-------------|----------------|---------|---------------|-------------|
| 2007   | Tundra heath    | Shrub tundra heath, dry         | 1.34 ± 0.02 | 322.29 ± 23.71 | 32 – 33 | 0.573 – 0.731 | 0.54 – 0.64 |
|        |                 | ” , moist                       | 1.42 ± 0.09 | 264.94 ± 17.56 | 32 – 34 | 0.447 – 0.623 | 0.66 – 0.80 |
|        |                 | <i>Betula nana</i> tundra heath | 1.45 ± 0.13 | 252.43 ± 14.26 | 32 – 37 | 0.433 – 0.549 | 0.55 – 0.87 |
|        |                 | Dry lichen tundra heath         | 0.96 ± 0.05 | 244.32 ± 7.97  | 32 – 36 | 0.540 – 0.639 | 0.37 – 0.47 |
|        | Dry peatlands   | Tundra bog, dry                 | 0.88 ± 0.06 | 292.57 ± 15.24 | 34 – 35 | 0.434 – 0.560 | 0.51 – 0.64 |
|        |                 | “ , moist                       | 1.00 ± 0.06 | 321.08 ± 10.26 | 34 – 37 | 0.643 – 0.724 | 0.43 – 0.51 |
|        |                 | Bare peat                       | 0.60 ± 0.03 | 391.63 ± 33.42 | 30 – 34 | 0.771 – 0.913 | 0.21 – 0.25 |
|        | Wetlands        | Willow                          | 1.59 ± 0.15 | 412.87 ± 9.71  | 30 – 31 | 0.540 – 0.642 | 0.84 – 1.26 |
|        |                 | Fen, <i>Carex</i>               | 1.23 ± 0.14 | 388.41 ± 3.03  | 30 – 32 | 0.688 – 0.833 | 0.61 – 0.65 |
|        |                 | “ , <i>Eriophorum</i>           | 0.48 ± 0.25 | 380.85 ± 99.82 | 28 – 31 | 0.319 – 0.575 | 0.21 – 0.64 |
| 2008   | Tundra heath    | Shrub tundra heath, dry         | 1.24 ± 0.06 | 245.71 ± 30.52 | 34 – 37 | 0.622 – 0.793 | 0.38 – 0.46 |
|        |                 | ” , moist                       | 1.30 ± 0.13 | 299.97 ± 24.57 | 35 – 36 | 0.764 – 0.848 | 0.37 – 0.48 |
|        |                 | <i>Betula nana</i> tundra heath | 1.04 ± 0.06 | 274.08 ± 24.73 | 35 – 36 | 0.704 – 0.820 | 0.27 – 0.54 |
|        |                 | Dry lichen tundra heath         | 1.12 ± 0.09 | 225.17 ± 16.93 | 38 – 40 | 0.589 – 0.795 | 0.39 – 0.49 |
|        | Dry peatlands   | Tundra bog, dry                 | 0.77 ± 0.06 | 318.04 ± 29.35 | 38 – 40 | 0.733 – 0.740 | 0.35 – 0.39 |
|        |                 | “ , moist                       | 1.57 ± 0.06 | 271.69 ± 32.96 | 36 – 37 | 0.598 – 0.845 | 0.55 – 0.67 |
|        |                 | Bare peat                       | 0.76 ± 0.03 | 372.61 ± 52.17 | 35 – 37 | 0.717 – 0.841 | 0.42 – 0.55 |
|        | Wetlands        | Willow                          | 1.72 ± 0.12 | 464.26 ± 21.73 | 32 – 33 | 0.766 – 0.814 | 0.95 – 1.05 |
|        |                 | Fen, <i>Carex</i>               | 1.54 ± 0.26 | 427.80 ± 19.86 | 34 – 35 | 0.598 – 0.845 | 0.71 – 1.46 |
|        |                 | “ , <i>Eriophorum</i>           | 0.60 ± 0.07 | 314.07 ± 69.25 | 34      | 0.433 – 0.678 | 0.41 – 0.47 |

**Table S2.** Summary of gross photosynthesis (GP) models for microsites studied with chamber technique;  $Q$  = maximum GP,  $k$  = PAR level at which GP reaches half of  $Q$ ,  $T_{opt}$  = temperature optimum of GP,  $T_{tol}$  = temperature tolerance of GP,  $a$  = correction term for LAI.

| Period       | Land cover    | Microsite                       | Model type | $Q$                | $k$             | $T_{opt}$        | $T_{tol}$       | $a$             | df  | $r^2$ | RMSE |
|--------------|---------------|---------------------------------|------------|--------------------|-----------------|------------------|-----------------|-----------------|-----|-------|------|
| 2007         | Tundra heath  | Shrub tundra heath, dry         | 1          | $-17.09 \pm 5.15$  | $320 \pm 96$    | $19.5 \pm 10.8$  | $17.7 \pm 11.5$ | $0.0 \pm 0.1$   | 58  | 0.742 | 0.60 |
|              |               | "                               | 1          | $-5.22 \pm 0.66$   | $453 \pm 70$    | $14.7 \pm 0.5$   | $9.5 \pm 0.8$   | $1.4 \pm 0.3$   | 95  | 0.887 | 0.85 |
|              |               | <i>Betula nana</i> tundra heath | 1          | $-11.89 \pm 4.74$  | $297 \pm 85$    | $27.4 \pm 13.2$  | $16.8 \pm 7.9$  | $0.2 \pm 0.1$   | 84  | 0.735 | 0.98 |
|              |               | Dry lichen tundra heath         | 1          | $-6.02 \pm 4.36$   | $409 \pm 104$   | $16.2 \pm 1.1$   | $10.1 \pm 1.8$  | $0.8 \pm 0.7$   | 85  | 0.731 | 0.63 |
|              | Dry peatlands | Tundra bog, dry                 | 1          | $-3.64 \pm 0.71$   | $353 \pm 70$    | $15.2 \pm 1.0$   | $10.8 \pm 1.5$  | $0.8 \pm 0.4$   | 90  | 0.832 | 0.67 |
|              |               | "                               | 1          | $-3.20 \pm 0.66$   | $306 \pm 47$    | $17.4 \pm 1.2$   | $9.4 \pm 1.2$   | $2.6 \pm 0.6$   | 101 | 0.869 | 0.85 |
|              |               | Bare peat                       | 4          | $-4.01 \pm 10.24$  | $335 \pm 152$   | $38.2 \pm 133.3$ | $25.6 \pm 67.0$ | –               | 69  | 0.391 | 0.36 |
|              | Wetlands      | Willow                          | 2          | $-9.48 \pm 2.50$   | $465 \pm 132$   | $15.5 \pm 1.1$   | $8.4 \pm 1.5$   | $0.3 \pm 0.6$   | 82  | 0.731 | 2.43 |
|              |               | Fen, <i>Carex</i>               | 1          | $-3.76 \pm 0.83$   | $329 \pm 59$    | $16.4 \pm 2.2$   | $10.8 \pm 2.4$  | $3.2 \pm 0.9$   | 81  | 0.812 | 1.59 |
|              |               | "                               | 1          | $-15.52 \pm 5.17$  | $148 \pm 52$    | $25.5 \pm 10.3$  | $13.3 \pm 6.2$  | $0.1 \pm 0.0$   | 82  | 0.763 | 0.62 |
| May–Jul 2008 | Tundra heath  | Shrub tundra heath, dry         | 1          | $-3.61 \pm 2.54$   | $196 \pm 98$    | $16.2 \pm 2.3$   | $10.8 \pm 2.5$  | $1.0 \pm 0.9$   | 87  | 0.430 | 0.62 |
|              |               | "                               | 1          | $-8.74 \pm 1.24$   | $286 \pm 100$   | $16.5 \pm 1.5$   | $10.0 \pm 3.0$  | $0.2 \pm 0.1$   | 77  | 0.860 | 0.99 |
|              |               | <i>Betula nana</i> tundra heath | 1          | $-13.66 \pm 2.84$  | $441 \pm 119$   | $21.4 \pm 7.1$   | $15.9 \pm 7.3$  | $0.1 \pm 0.0$   | 77  | 0.835 | 0.59 |
|              |               | Dry lichen tundra heath         | 3          | $-1.89 \pm 0.00$   | $194 \pm 0$     | –                | –               | $0.0 \pm 88.5$  | 87  | 0.645 | 0.70 |
|              | Dry peatlands | Tundra bog, dry                 | 3          | $-0.3 \pm 0.05$    | $428 \pm 0$     | –                | –               | $0.6 \pm 119.0$ | 87  | 0.827 | 0.69 |
|              |               | "                               | 1          | $-5.01 \pm 0.92$   | $371 \pm 78$    | $17.5 \pm 0.3$   | $5.1 \pm 0.4$   | $2.3 \pm 0.5$   | 92  | 0.881 | 0.97 |
|              |               | Bare peat                       | 4          | $-1.36 \pm 0.31$   | $133 \pm 3$     | $17.4 \pm 139.3$ | $7.7 \pm 2.4$   | –               | 75  | 0.171 | 0.30 |
|              | Wetlands      | Willow                          | 2          | $-12.84 \pm 1.49$  | $383 \pm 106$   | $20.8 \pm 5.0$   | $13.0 \pm 10.2$ | $0.1 \pm 0.1$   | 35  | 0.909 | 2.38 |
|              |               | Fen, <i>Carex</i>               | 1          | $-7.24 \pm 1.29$   | $261 \pm 102$   | $19.0 \pm 1.7$   | $7.9 \pm 2.7$   | $0.8 \pm 0.2$   | 78  | 0.754 | 1.58 |
|              |               | "                               | 1          | $-6.18 \pm 2.15$   | $110 \pm 87$    | $20.8 \pm 0.7$   | $4.3 \pm 0.7$   | $0.4 \pm 0.2$   | 74  | 0.652 | 0.50 |
| Aug–Oct      | Tundra heath  | Shrub tundra heath, dry         | 1          | $-5.09 \pm 1.58$   | $353 \pm 79$    | $8.4 \pm 0.7$    | $6.1 \pm 1.1$   | $1.0 \pm 0.3$   | 67  | 0.747 | 1.19 |
|              |               | "                               | 1          | $-3.86 \pm 0.56$   | $281 \pm 55$    | $9.8 \pm 0.5$    | $5.5 \pm 1.5$   | $1.3 \pm 0.3$   | 71  | 0.818 | 1.39 |
|              |               | <i>Betula nana</i> tundra heath | 1          | $-8.07 \pm 1.14$   | $269 \pm 52$    | $7.6 \pm 2.6$    | $9.0 \pm 3.9$   | $0.3 \pm 0.1$   | 67  | 0.867 | 0.87 |
|              |               | Dry lichen tundra heath         | 1          | $-5.09 \pm 4.11$   | $297 \pm 95$    | $8.7 \pm 0.4$    | $3.4 \pm 0.8$   | $0.9 \pm 0.8$   | 58  | 0.669 | 0.78 |
|              | Dry peatlands | Tundra bog, dry                 | 1          | $-3.47 \pm 0.79$   | $194 \pm 50$    | $15.3 \pm 9.0$   | $12.9 \pm 11.9$ | $0.5 \pm 0.3$   | 63  | 0.756 | 0.89 |
|              |               | "                               | 1          | $-7.98 \pm 1.58$   | $565 \pm 153$   | $9.6 \pm 0.2$    | $3.1 \pm 0.4$   | $1.5 \pm 0.4$   | 74  | 0.875 | 1.24 |
|              |               | Bare peat                       | 4          | $-4.49 \pm 2.82$   | $717 \pm 621$   | $11.9 \pm 4.2$   | $7.0 \pm 3.9$   | –               | 48  | 0.293 | 0.37 |
|              | Wetlands      | Willow                          | 2          | $-29.73 \pm 77.08$ | $1749 \pm 1423$ | $24.0 \pm 70.1$  | $14.2 \pm 35.4$ | $1.0 \pm 0.5$   | 44  | 0.765 | 2.17 |
|              |               | Fen, <i>Carex</i>               | 1          | $-4.32 \pm 1.14$   | $461 \pm 150$   | $12.9 \pm 1.8$   | $5.7 \pm 1.9$   | $2.6 \pm 0.9$   | 66  | 0.753 | 2.45 |
|              |               | "                               | 1          | $-12.48 \pm 2.32$  | $314 \pm 11.1$  | $11.1 \pm 1.2$   | $3.4 \pm 1.8$   | $0.1 \pm 0.0$   | 63  | 0.781 | 0.78 |
